# Supplementary material for: Multifunctional cobalt metal–organic framework luminescent probe for the efficient sensing of Cr2O72−, MnO4− and nucleobases
Source: Royal Society of Chemistry journal article supplement (doi:10.1039/d3nj00719g), 2023-01-01
Supplement: d3nj00719g1.pdf [file d3nj00719g1.pdf]

## Supporting Information

# Multifunctional Cobalt Metal Organic Framework luminescent probe for efficient sensing of $\text{Cr}_2\text{O}_7^{2-}$ , $\text{MnO}_4^-$ and Nucleobases

*Ritu Ladhi* <sup>[a]</sup>, *Deepika Rani*, <sup>[a,b]</sup>, *Monika Singh* <sup>\*[a]</sup>

<sup>a]</sup> Institute of Nano Science and Technology, Knowledge City, Sector-81, Mohali-140306,  
Punjab, INDIA

<sup>b]</sup> Department of Chemistry, Panjab University, Chandigarh, INDIA

\*Corresponding author: [monika@inst.ac.in](mailto:monika@inst.ac.in)

## Contents

| <b>Section</b> | <b>Description</b>                                                                                                                                                                                                                                               | <b>Page No.</b> |
|----------------|------------------------------------------------------------------------------------------------------------------------------------------------------------------------------------------------------------------------------------------------------------------|-----------------|
| Section S1     | General information and crystallographic (Table S1)                                                                                                                                                                                                              | S-3, S-4        |
| Section S2     | Characterization and crystallographic figures of Co- <i>bpy</i> : PXRD profiles, FESEM, BET isotherm, TGA profiles and emission spectra, Fluorescence intensity spectra related to sensing of anions and different nucleobase by Co- <i>bpy</i> (Figures S1-S17) | S-5 to S-13     |
| Section S3     | Detection limit calculation, determination of Stern-Volmer constant (Figures S18- S25)                                                                                                                                                                           | S-14 to S-18    |
| Section S4     | UV- <i>Vis</i> spectral overlap , Lifetime measurements table and Recyclability plot, images under UV lamp (Figures S26-S32, Table S2 and S3), literature comparison (table S4 and S5)                                                                           | S-19 to S-24    |
| References     |                                                                                                                                                                                                                                                                  | S-25 to S-26    |

## Section S1: General information

**Materials** The reactants and solvents used in the procedure are obtained commercially from Sigma, CDH Fine chemicals and LobaChemei and used as purchased without any further purification

**Physical Measurements** FT-IR spectra were recorded on a PerkinElmer Spectrum I spectrometer with samples prepared as KBr pellets in the range of 4000-400  $\text{cm}^{-1}$ . The solid state (DRS) and solution state UV-Vis spectra of compound and analyte were explored by UV/Vis spectrophotometer (Shimadzu UV-2600). The morphological studies were carried out by field emission scanning electron microscopy (FESEM) on a JEOL JSM-7600F system. TGA analysis was carried out using Perkin–Elmer Pyris 1 model on well ground samples in flowing nitrogen atmosphere at a heating rate of 10  $^{\circ}\text{C}/\text{min}$ . Emission spectra were recorded using an EDINBURGH instrument FS5 spectrophotometer. Time-resolved lifetime decay profiles were measured using photoluminescence Fluorolog 3-221 (Horiba Scientific) single photon counting controller. Powder X-ray diffraction analysis was carried out on a Bruker D8-Advance Eco Diffractometer using Ni-filtered  $\text{Cu K}\alpha$  radiation at room temperature. The data were collected over the range of  $5^{\circ} < 2\theta < 80^{\circ}$  with a step size of  $0.01^{\circ}$ . The BET nitrogen isotherm analysis was carried out on Quantachrome ASiQwin at 300 K.

**Single-Crystal X-ray Data Collection and Refinements** The structural analysis was carried out by Single crystal XRD on a CMOS based Bruker D8 Venture PHOTON 100 diffractometer equipped with a INCOATEC micro-focus source with graphite monochromated  $\text{Mo K}\alpha$  radiation ( $\lambda = 0.71073 \text{ \AA}$ ) operating at 50 kV and 30 mA. The crystal structures were solved by using SHELXS97 or SHELXT<sup>1</sup> and were refined using SHELXL97<sup>2</sup> through Olex2 suite.<sup>3</sup>All the hydrogen atoms were geometrically fixed and refined using the riding model. Multi-scan method was employed for absorption correction.

**Table S1: Crystallographic parameters of *Co-bpy*.**

|                                        |                                                                  |
|----------------------------------------|------------------------------------------------------------------|
| Parameters                             | Co ( <i>bpy</i> ) (HCOO) <sub>2</sub>                            |
| Formula                                | C <sub>12</sub> H <sub>10</sub> Co N <sub>2</sub> O <sub>4</sub> |
| Formula weight (g)                     | 305.15                                                           |
| Temperature (K)                        | 273.15                                                           |
| Wavelength (Å)                         | 0.71073                                                          |
| Crystal system                         | Tetragonal                                                       |
| Space group                            | <i>P 4<sub>1</sub> 2<sub>1</sub> 2</i>                           |
| <i>a</i> (Å)                           | 7.9826(3)                                                        |
| <i>b</i> (Å)                           | 7.9826(3)                                                        |
| <i>c</i> (Å)                           | 17.5851(9)                                                       |
| $\alpha$ (°)                           | 90.00                                                            |
| $\beta$ (°)                            | 90.00                                                            |
| $\gamma$ (°)                           | 90.00                                                            |
| <i>V</i> (Å <sup>3</sup> )             | 1120.56(8)                                                       |
| <i>Z</i>                               | 4                                                                |
| $\theta$ (deg) range for data collecn  | 2.80-26.41                                                       |
| dcalc (gcm <sup>-3</sup> )             | 1.809                                                            |
| $\mu$ MoK $\alpha$ (cm <sup>-1</sup> ) | 1.543                                                            |
| R1 ( <i>I</i> >2 $\sigma$ <i>I</i> )   | 0.0147                                                           |
| wR2 (all)                              | 0.0381                                                           |
| CCDC No.                               | 2203219                                                          |

## Section S2: Crystallographic Figures and Characterization of Co-*bpy*

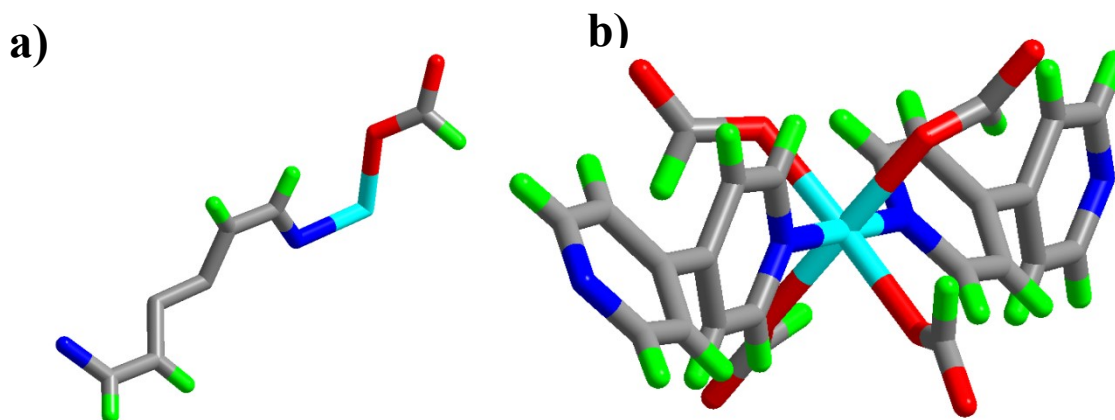

**Figure S1.** a) Asymmetric unit of **Co-*bpy*** and b) Coordination environment around Co(II) center, (Color code: Cobalt, sky blue; carbon, grey; nitrogen, royal blue; oxygen, red; hydrogen, green).

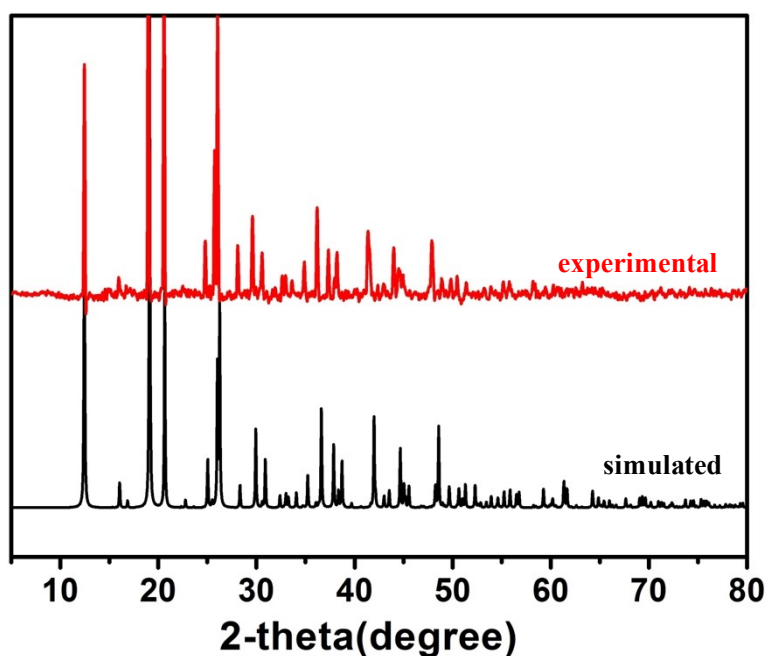

**Figure S2.** PXRD profiles of **Co-*bpy*** (simulated and experimental patterns)

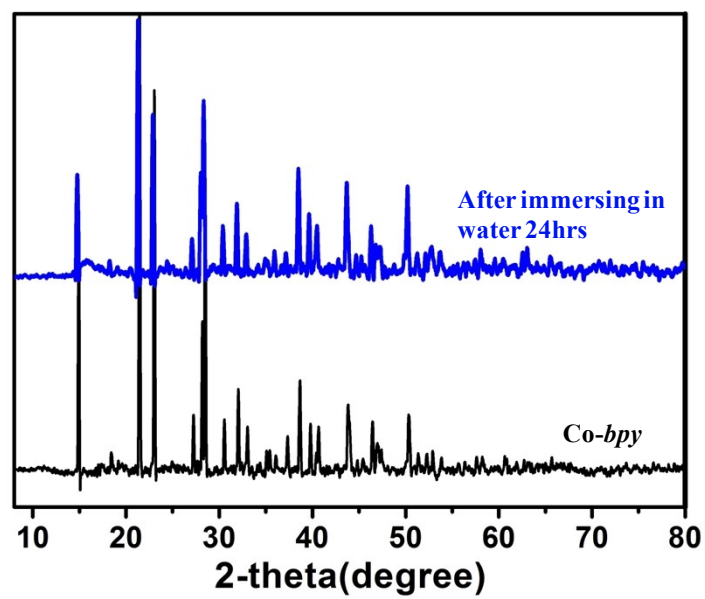

**Figure S3.** PXRD profiles of *Co-bpy* before and after immersing in water for 24hrs.

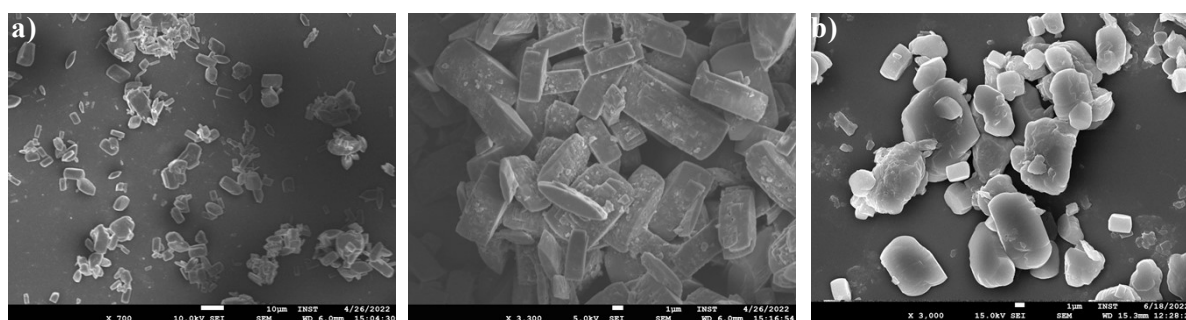

**Figure S4.** FESEM images of *Co-bpy* dispersed in a) DMF and b) H<sub>2</sub>O.

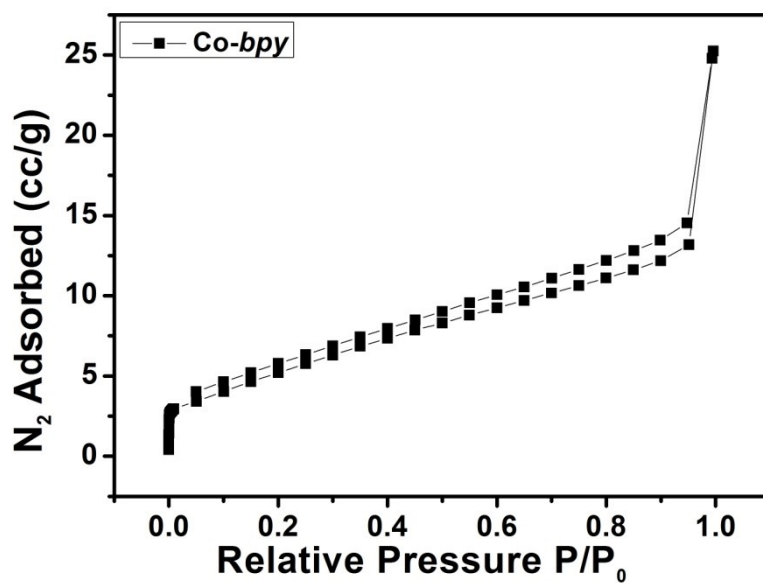

Figure S5:  $N_2$  adsorption Isotherm of *Co-bpy* at 77K.

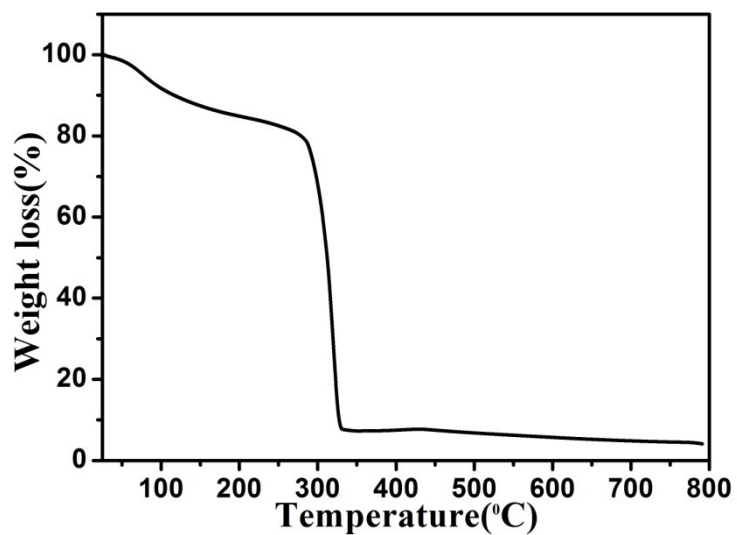

Figure S6: TGA spectra *Co-bpy*.

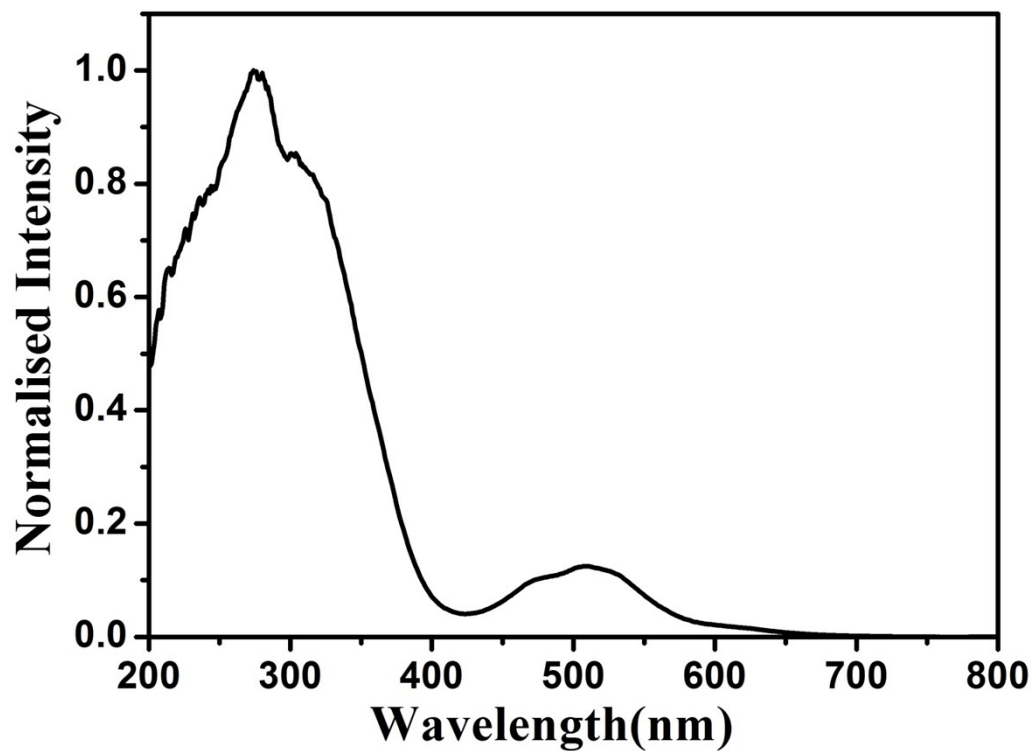

Figure S7. Solid-state UV-Vis spectrum of *Co-bpy*.

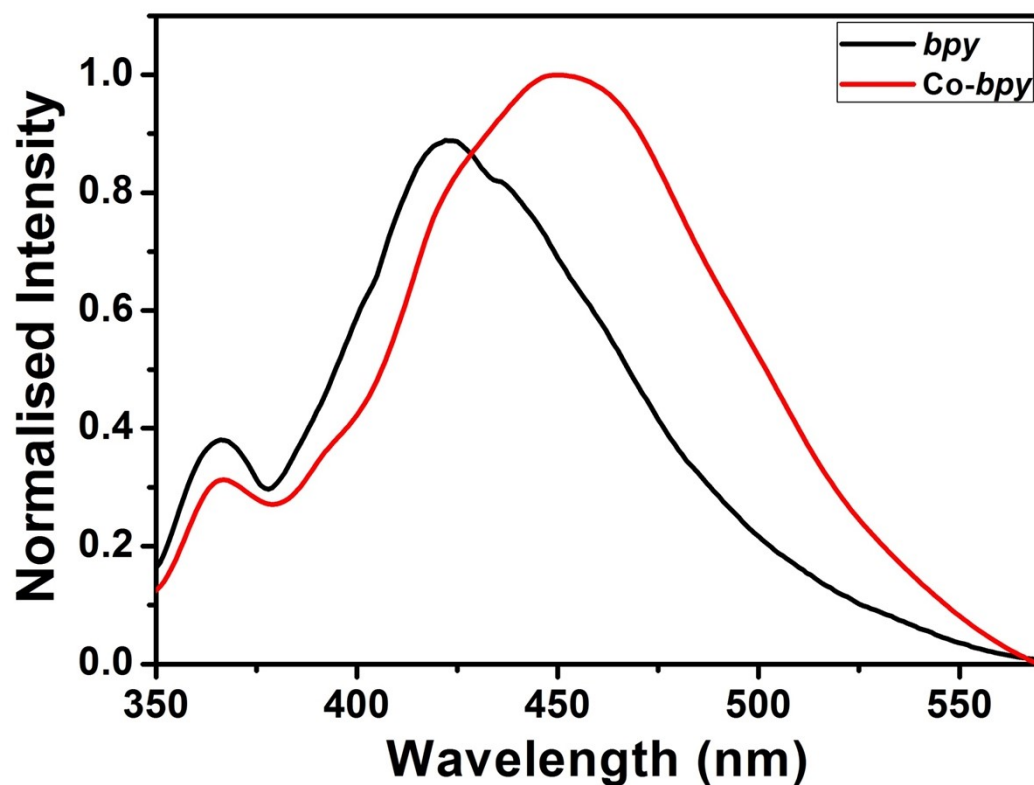

Figure S8. Emission spectra of *Co-bpy* and *bpy* ligand.



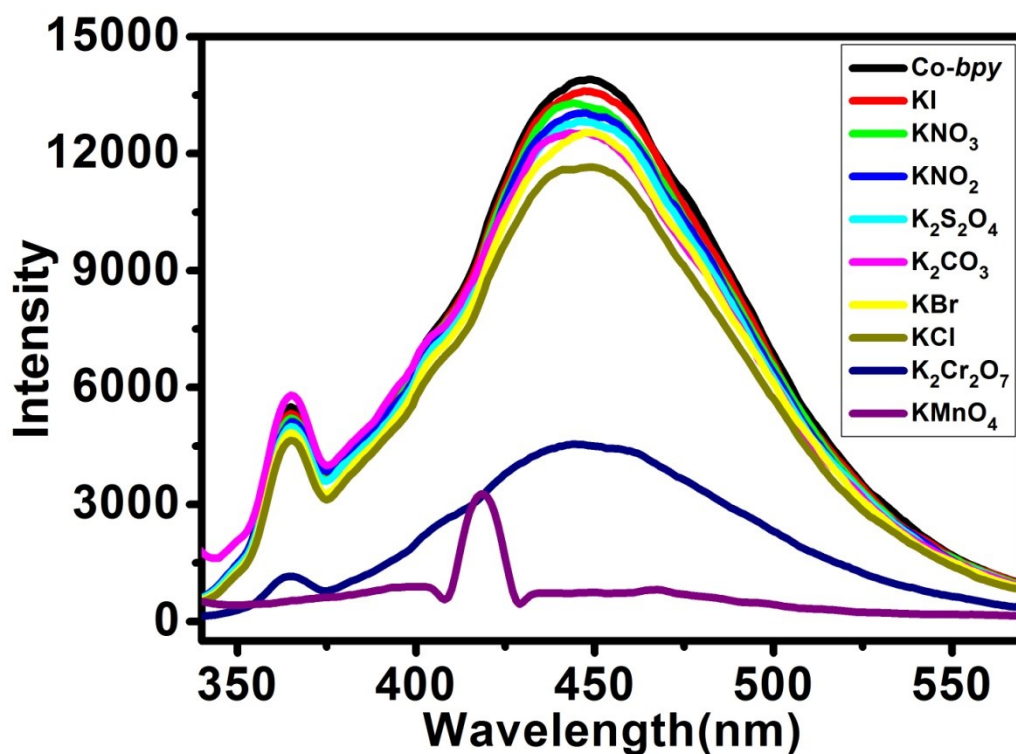

Figure S9. Emission spectra of *Co-bpy* in presence of different anions (0.25 mM).

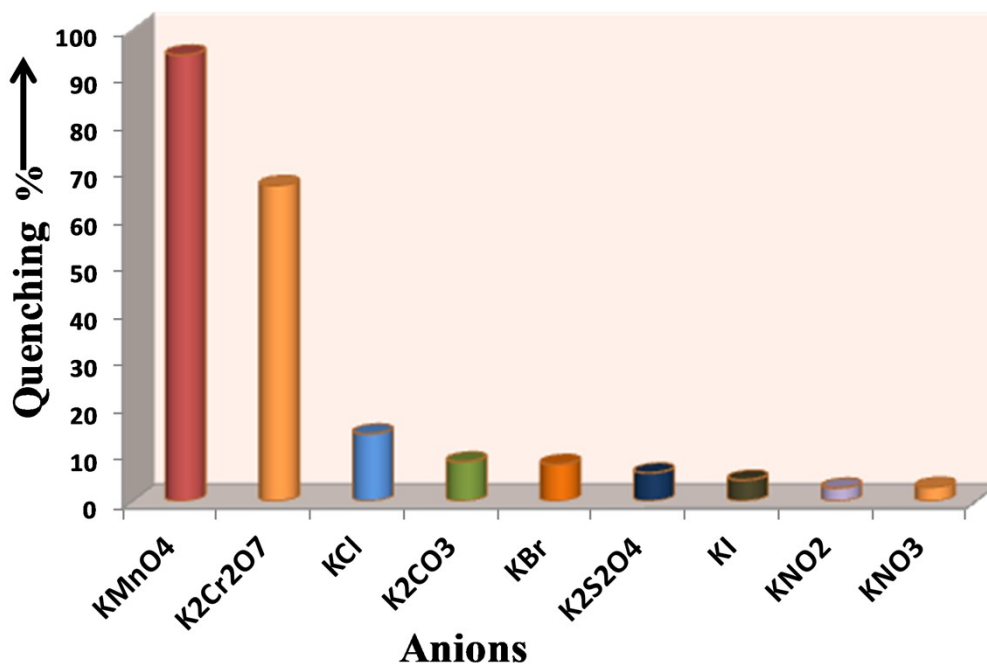

Figure S10. Bar diagram of emission intensity of *Co-bpy* in presence of different anions (0.25 mM).

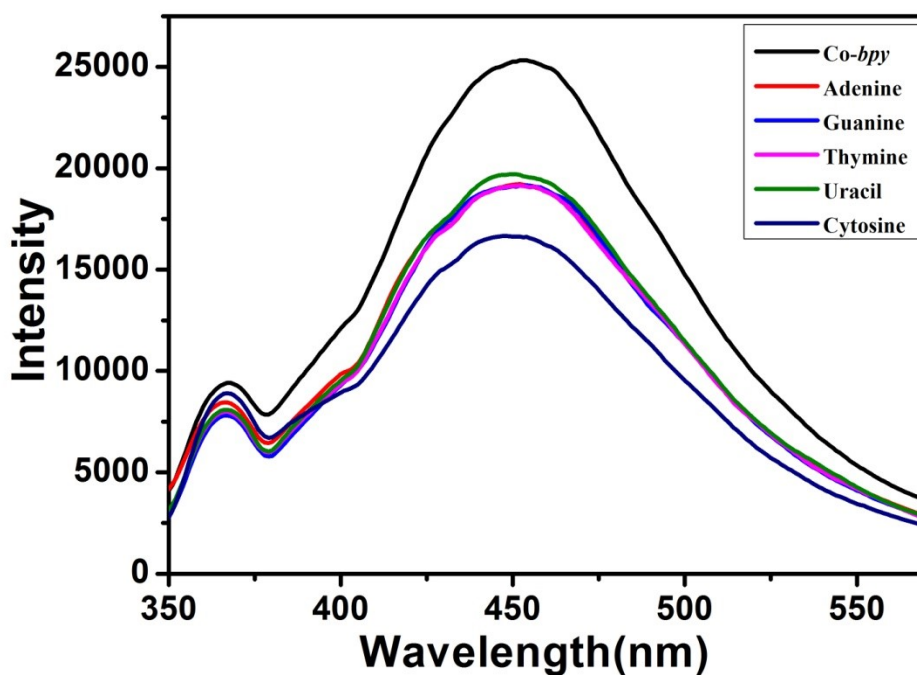

**Figure S11.** Emission spectra of *Co-bpy* in presence of Cytosine, Guanine, Thymine, Adenine and Uracil (10 $\mu$ M).

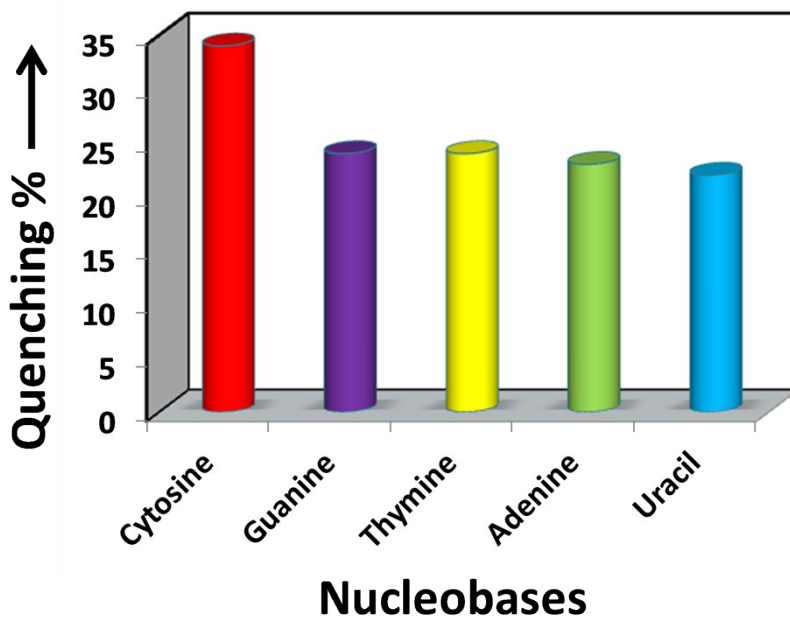

**Figure S12.** Bar diagram of emission intensity of *Co-bpy* in presence of Cytosine, Guanine, Thymine, Adenine and Uracil (10 $\mu$ M).

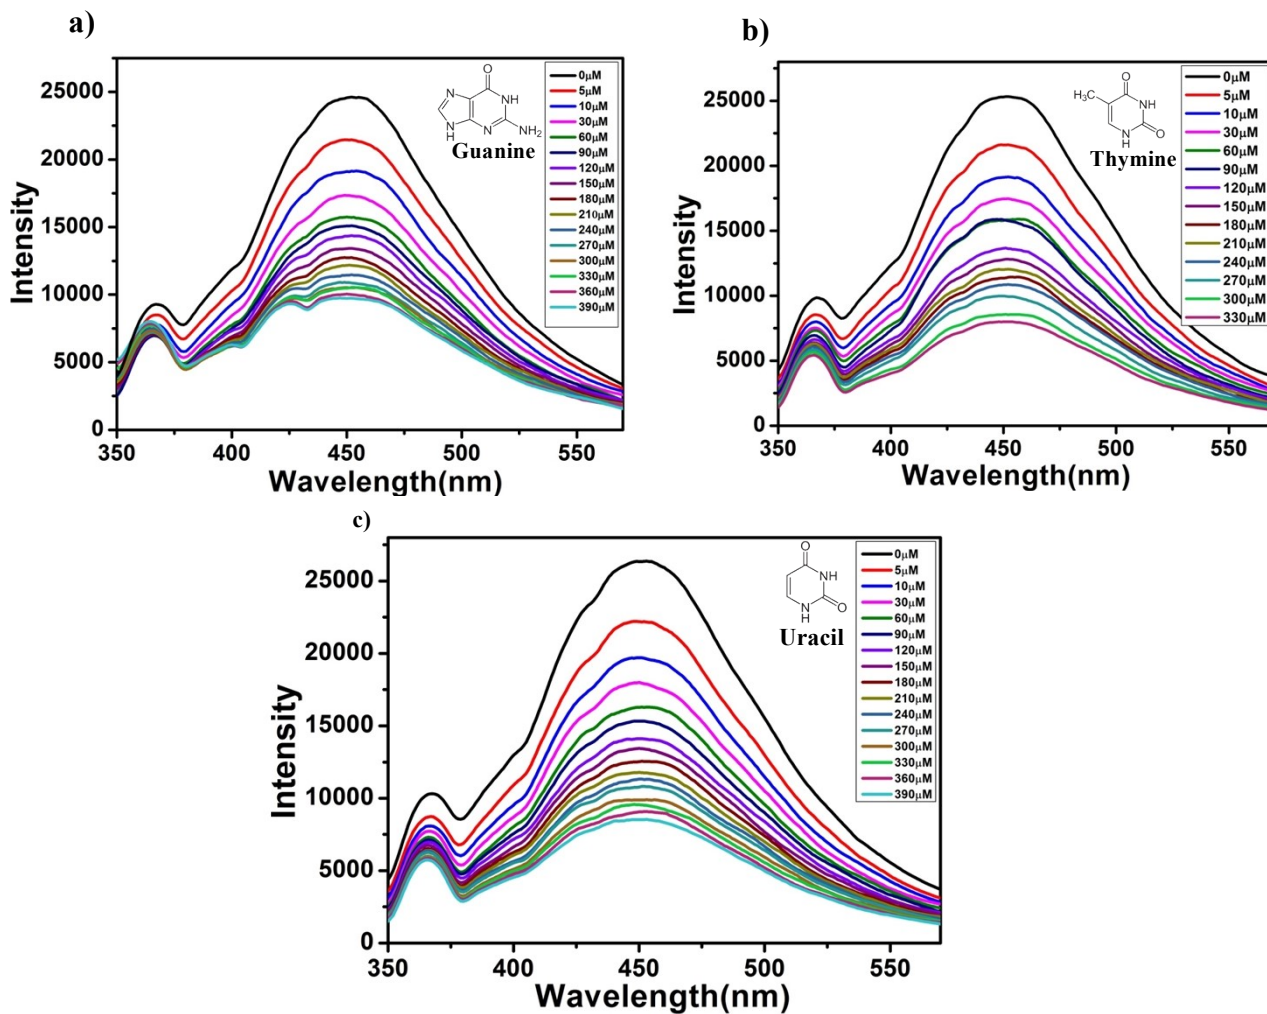

**Figure S13.** Change in emission spectrum of *Co-bpy* dispersed in water upon addition of a) Guanine b) Thymine and c) Uracil.

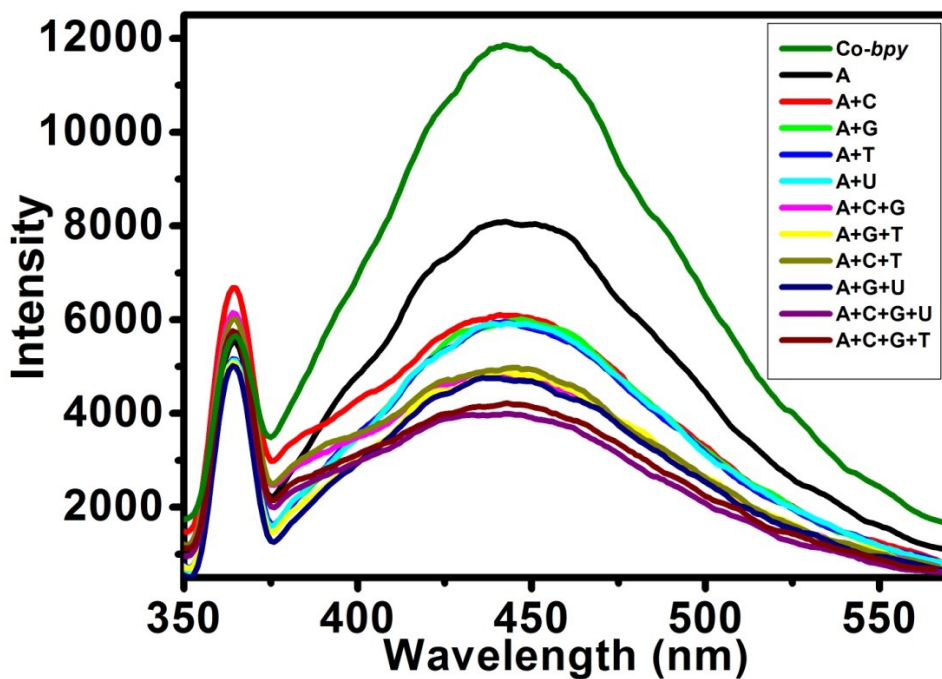

**Figure S14.** Change in emission spectrum of *Co-bpy* dispersed in water upon addition of Adenine (only) and Adenine along with other nucleobases (A- Adenine, C-Cytosine, G-Guanine, T-Thymine, U-Uracil) 10 $\mu$ M each.

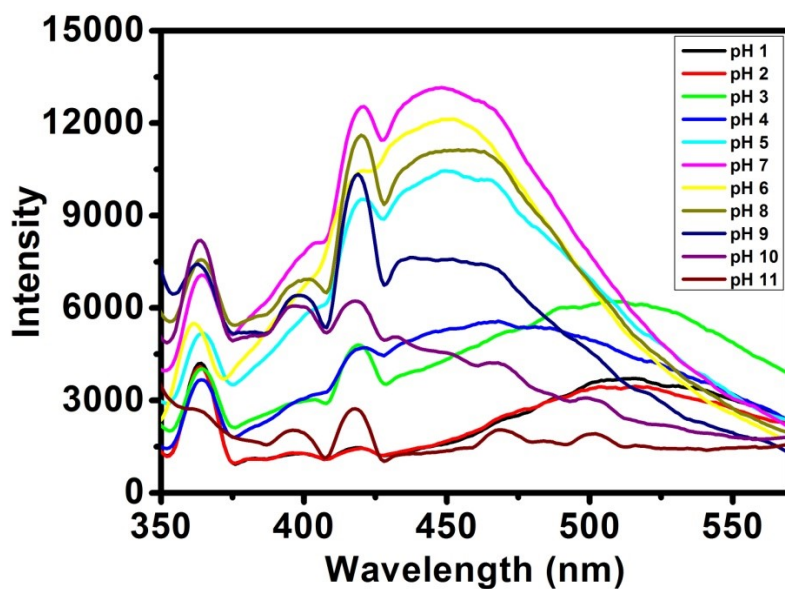

**Figure S15.** The fluorescence of *Co-bpy* at pH=1-11 solutions.

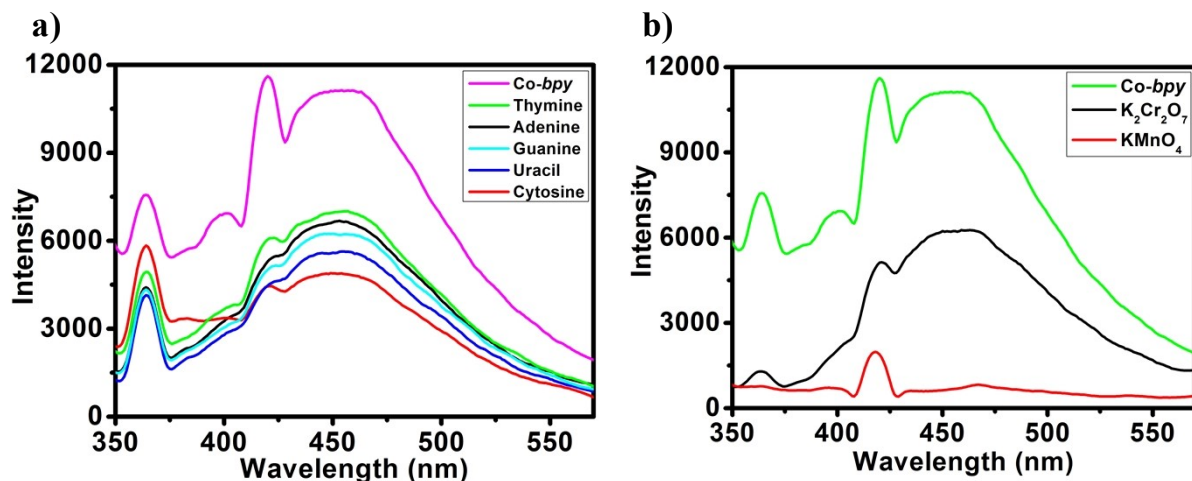

**Figure S16.** Change in emission spectrum of *Co-bpy* at pH=8 upon addition of (a) nucleobases (10 $\mu$ M) and (b) oxo-anions (0.25 mM).

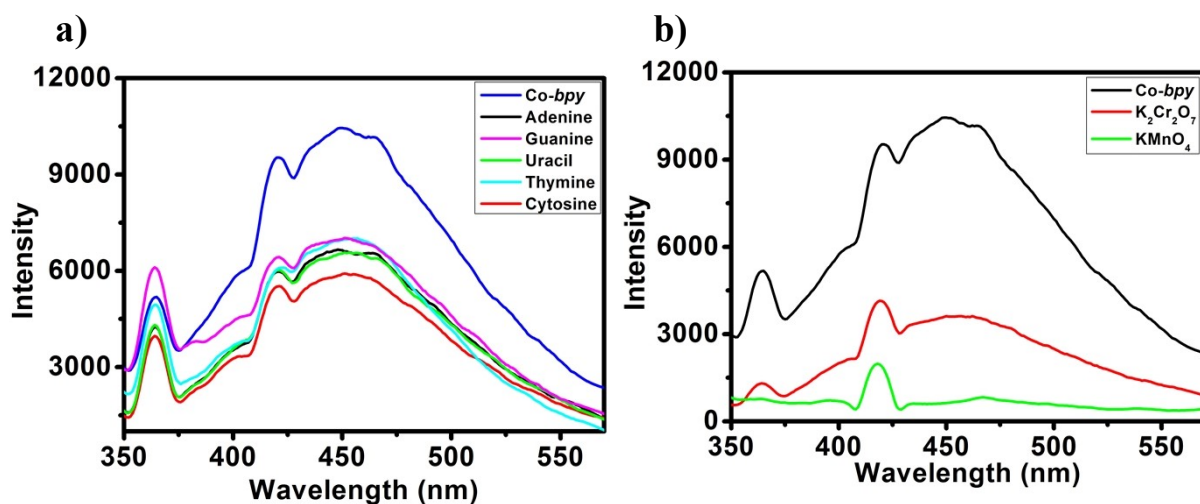

**Figure S17.** Change in emission spectrum of *Co-bpy* at pH=5 upon addition of (a) nucleobases (10 $\mu$ M) and (b) oxo-anions (0.25 mM).

### Section S3: Detection limit calculation, determination of Stern-Volmer constant and binding constant

Detection limit was calculated using the following equation:

$$\text{Detection limit} = 3\sigma/m$$

Where 'σ' is the calculated standard deviation from five blank measurements and 'm' is the slope obtained from the plot of fluorescence emission with increasing concentration of analytes.

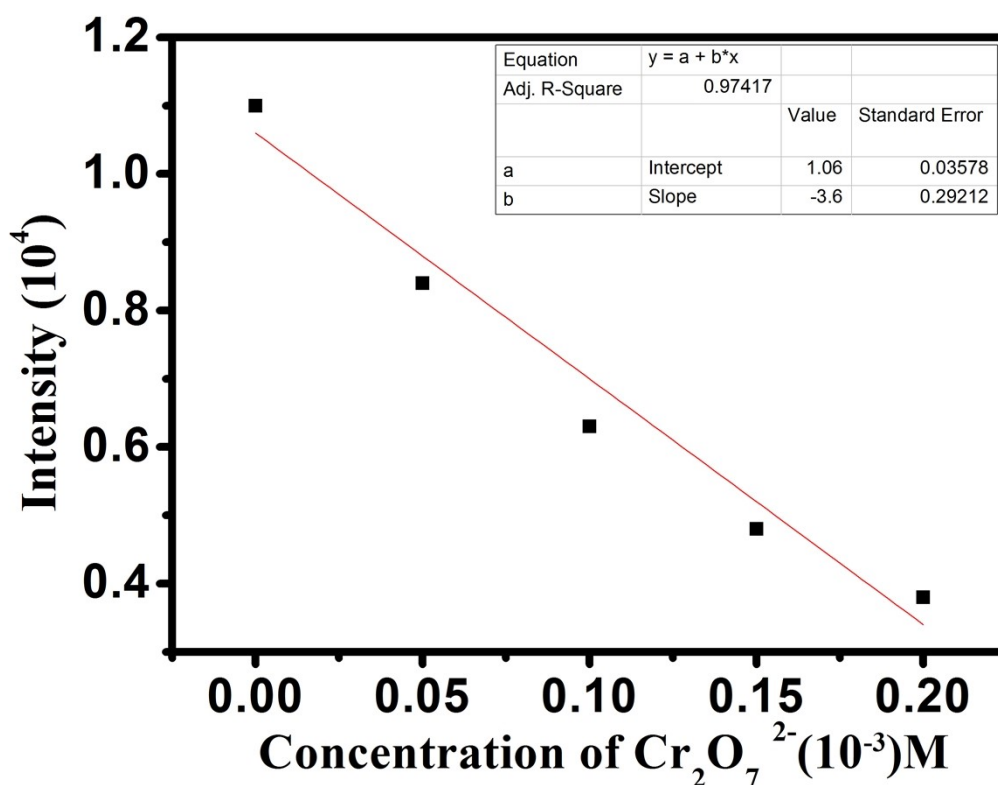

**Figure S18.** Determination of detection limit through fitting of the linear region of fluorescence intensity of **Co-bpy** upon adding different concentration of Cr<sub>2</sub>O<sub>7</sub><sup>2-</sup> to it at λ<sub>emi</sub> = 450 nm (upon λ<sub>exc</sub> = 325 nm).

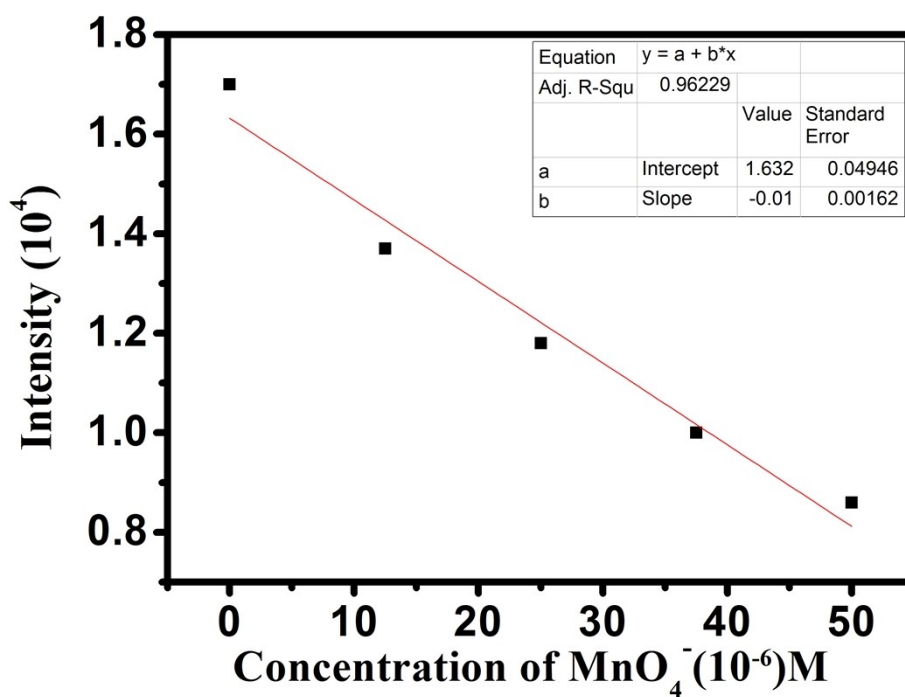

**Figure S19.** Determination of detection limit through fitting of the linear region of fluorescence intensity of *Co-bpy* upon adding different concentration of  $\text{MnO}_4^-$  to it at  $\lambda_{\text{emi}} = 450 \text{ nm}$  (upon  $\lambda_{\text{exc}} = 325 \text{ nm}$ ).

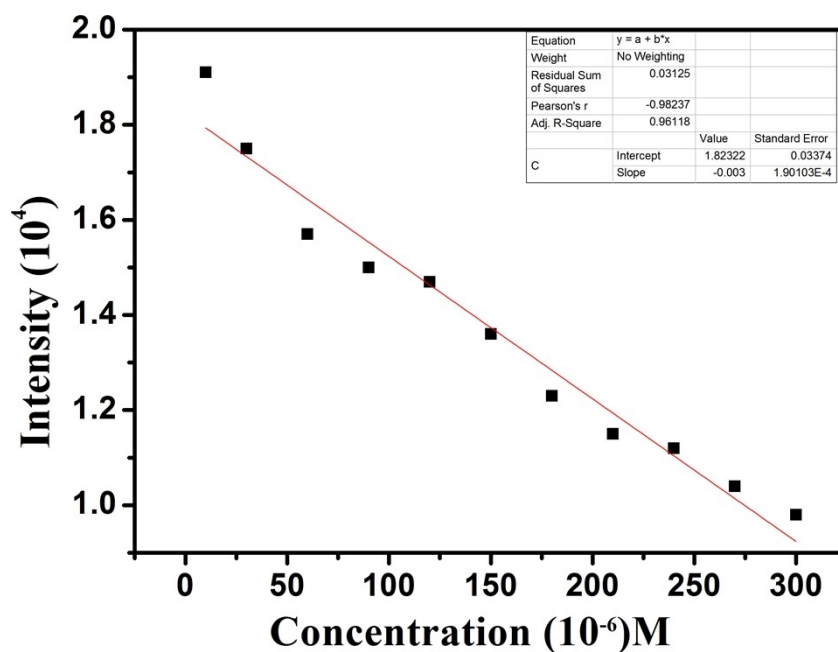

**Figure S20.** Determination of detection limit through fitting of the linear region of fluorescence intensity of *Co-bpy* upon adding different concentration of Adenine to it at  $\lambda_{\text{emi}} = 450 \text{ nm}$  (upon  $\lambda_{\text{exc}} = 325 \text{ nm}$ ).

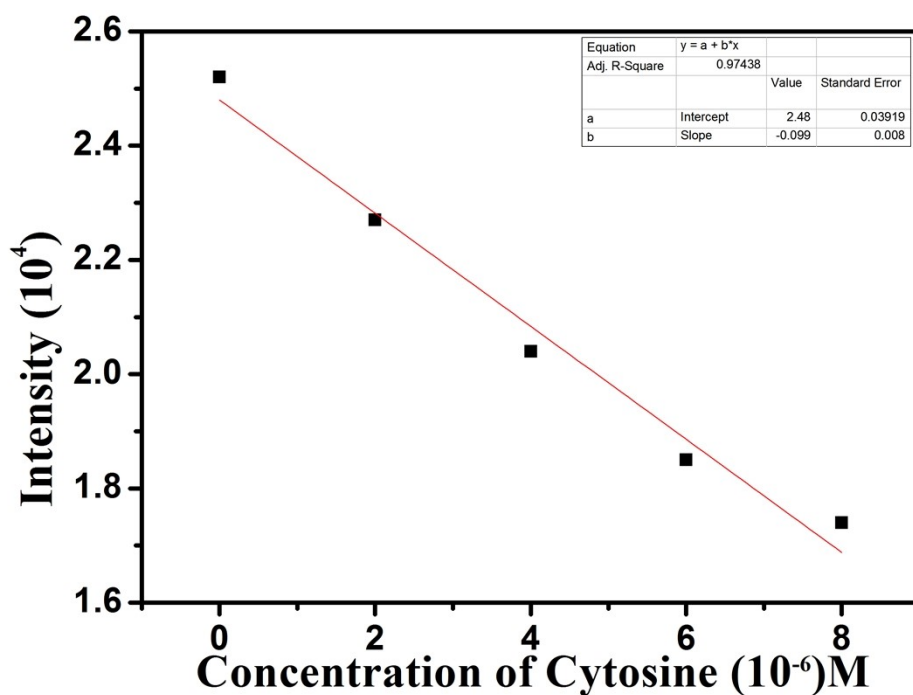

**Figure S21.** Determination of detection limit through fitting of the linear region of fluorescence intensity of **Co-bpy** upon adding different concentration of Cytosine to it at  $\lambda_{\text{emi}} = 450 \text{ nm}$  (upon  $\lambda_{\text{exc}} = 325 \text{ nm}$ ).

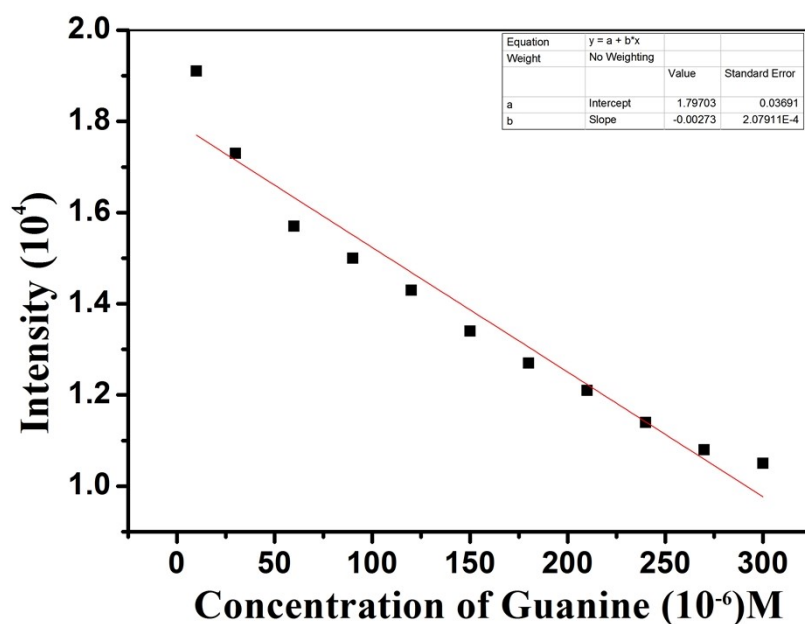

**Figure S22.** Determination of detection limit through fitting of the linear region of fluorescence intensity of **Co-bpy** upon adding different concentration of Guanine to it at  $\lambda_{\text{emi}} = 450 \text{ nm}$  (upon  $\lambda_{\text{exc}} = 325 \text{ nm}$ ).



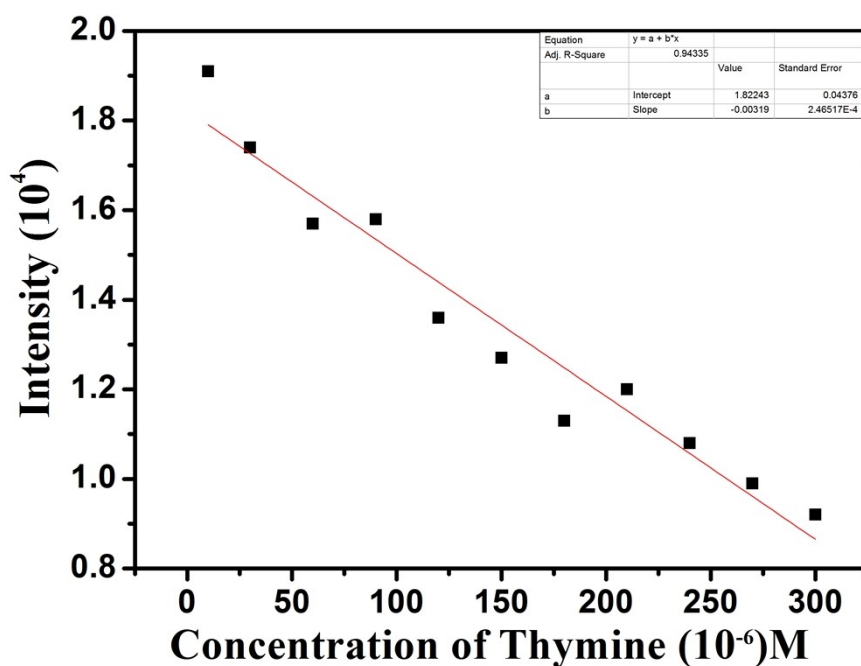

**Figure S23.** Determination of detection limit through fitting of the linear region of fluorescence intensity of **Co-bpy** upon adding different concentration of Thymine to it at  $\lambda_{\text{emi}} = 450 \text{ nm}$  (upon  $\lambda_{\text{exc}} = 325 \text{ nm}$ ).

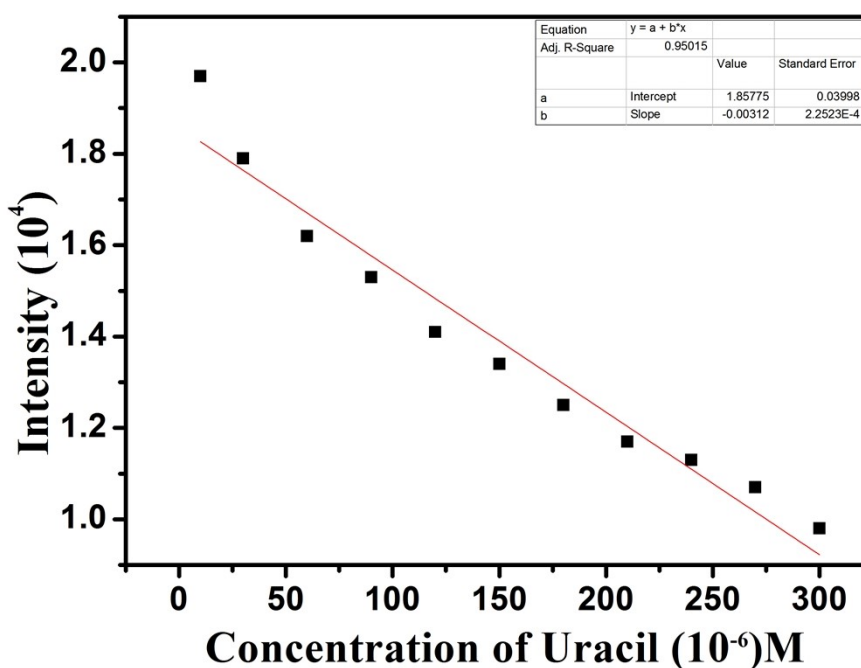

**Figure S24.** Determination of detection limit through fitting of the linear region of fluorescence intensity of **Co-bpy** upon adding different concentration of Uracil to it at  $\lambda_{\text{emi}} = 450 \text{ nm}$  (upon  $\lambda_{\text{exc}} = 325 \text{ nm}$ ).

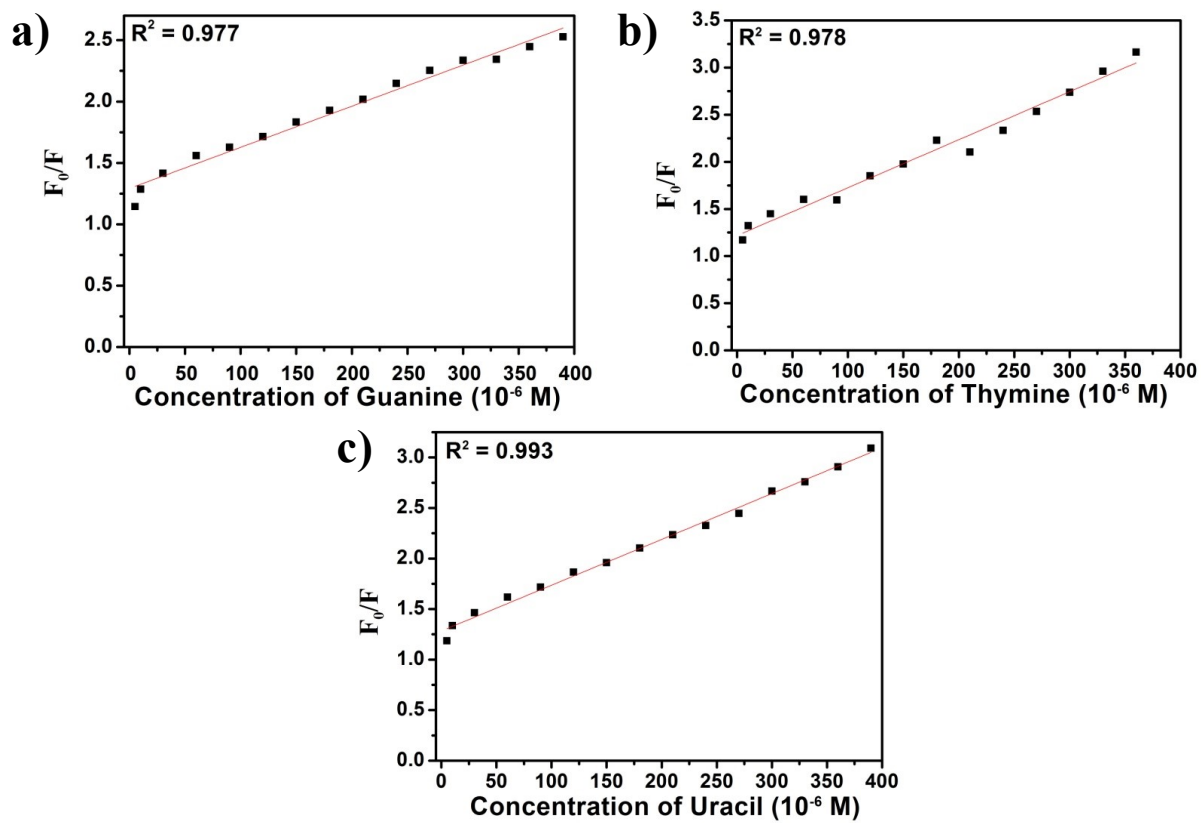

**Figure S25.** Stern-Volmer (SV) plot for a) Guanine, b) Thymine and c) Uracil in *Co-bpy*.

Section S4: UV-Vis absorbance spectral overlap, Lifetime measurements and Recyclability plot

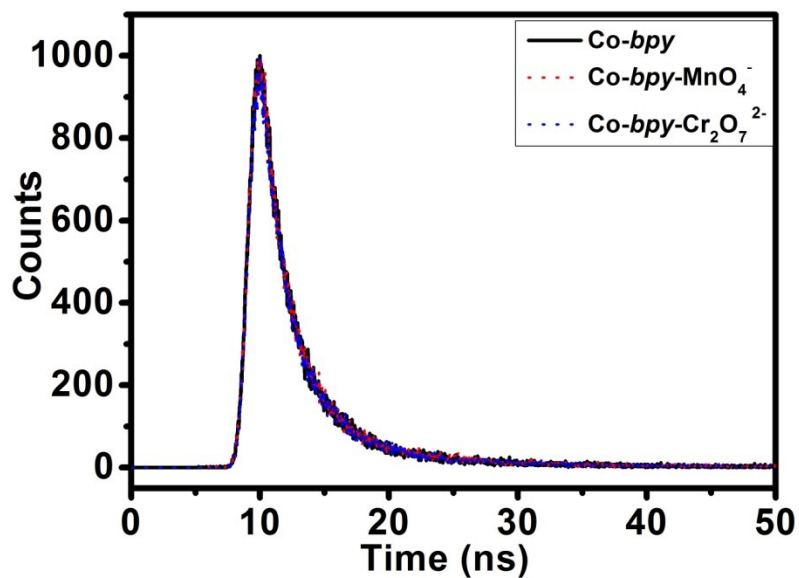

Figure S26. Lifetime decay profiles of **Co-bpy** before and after addition  $K_2Cr_2O_7$  and  $KMnO_4$ .

Table S2. Average lifetimes of **Co-bpy** before and after addition  $K_2Cr_2O_7$  and  $KMnO_4$ .

|                             | <b>Co-bpy(1)</b> | <b>1+<math>K_2Cr_2O_7</math></b> | <b>1+ <math>KMnO_4</math></b> |
|-----------------------------|------------------|----------------------------------|-------------------------------|
| $\tau_1$ (ns)               | 2.09             | 1.76                             | 1.70                          |
| $\alpha_1$                  | 0.75             | 0.54                             | 0.68                          |
| $\tau_2$ (ns)               | 8.31             | 7.06                             | 6.81                          |
| $\alpha_2$                  | 0.24             | 0.45                             | 0.31                          |
| $\langle \tau \rangle$ (ns) | 5.57             | 5.85                             | 5.01                          |

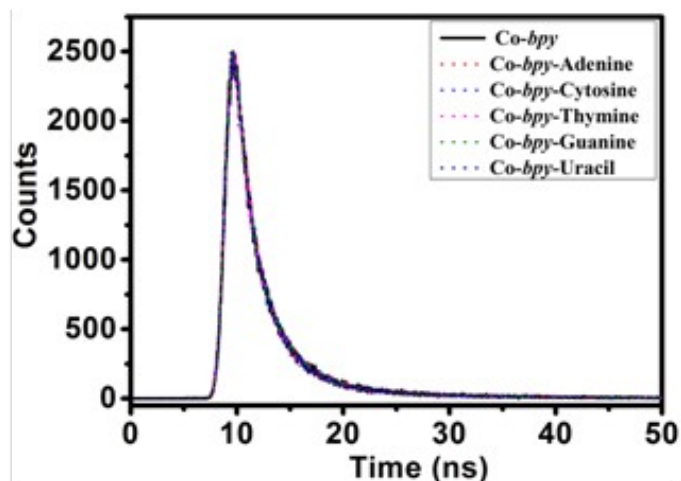

**Figure S27.** Lifetime decay profiles of **Co-bpy** before and after addition Adenine, Cytosine, Thymine, Guanine and Uracil.

**Table S3.** Average lifetimes of **Co-bpy** before and after addition Adenine, Cytosine, Thymine, Guanine and Uracil.

|                             | <b>Co-bpy(1)</b> | <b>1+Adenine</b> | <b>1+ Cytosine</b> | <b>1+ Thymine</b> | <b>1 + Guanine</b> | <b>1+ Uracil</b> |
|-----------------------------|------------------|------------------|--------------------|-------------------|--------------------|------------------|
| $\tau_1$ (ns)               | 2.09             | 2.09             | 2.09               | 2.09              | 2.10               | 2.05             |
| $\alpha_1$                  | 0.75             | 0.75             | 0.77               | 0.77              | 0.77               | 0.75             |
| $\tau_2$ (ns)               | 8.31             | 8.16             | 8.18               | 7.99              | 8.00               | 7.67             |
| $\alpha_2$                  | 0.24             | 0.24             | 0.23               | 0.23              | 0.23               | 0.25             |
| $\langle \tau \rangle$ (ns) | 5.57             | 5.46             | 5.38               | 5.27              | 5.28               | 5.15             |

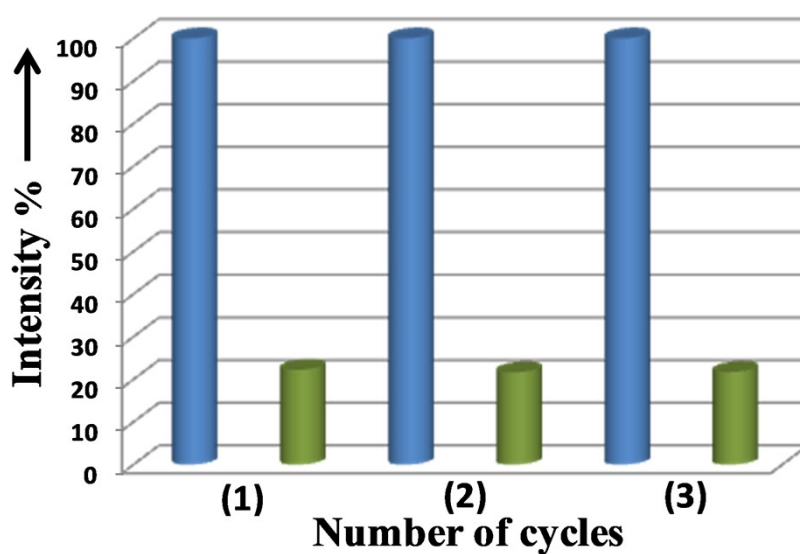

**Figure S28.** Recyclability plot of *Co-bpy* for three consecutive cycles in presence of  $K_2Cr_2O_7$  (blue bar represents emission intensity before addition of  $K_2Cr_2O_7$  and green bar represents emission intensity after addition of  $K_2Cr_2O_7$  (0.5mM)).

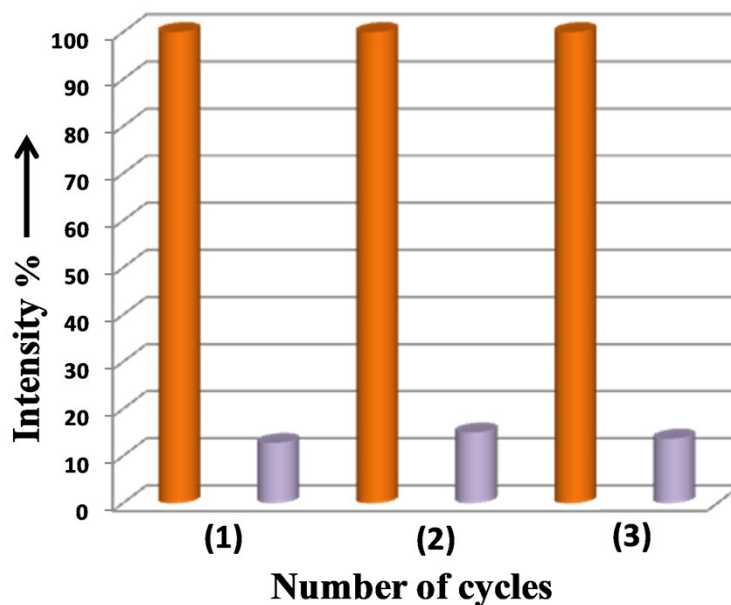

**Figure S29.** Recyclability plot of *Co-bpy* for three consecutive cycles in presence of  $KMnO_4$  (orange bar represents emission intensity before addition of  $KMnO_4$  and purple bar represents emission intensity after addition of  $KMnO_4$  (0.125 mM)).

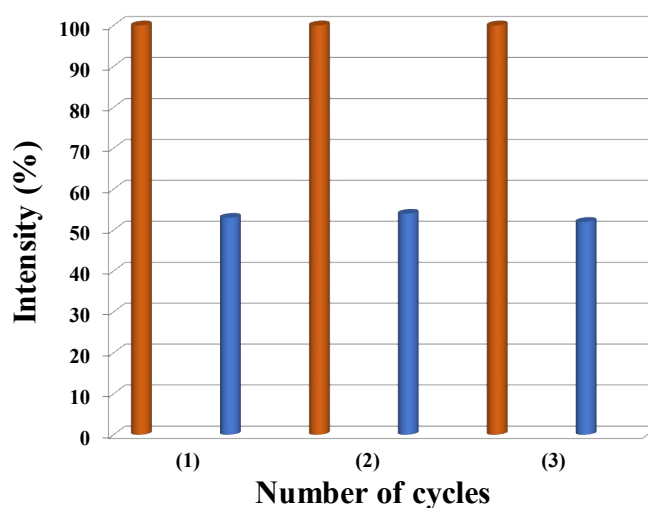

**Figure S30.** Recyclability plot of *Co-bpy* for three consecutive cycles in presence of Cytosine (brown bar represents emission intensity before addition of Cytosine and blue bar represents emission intensity after addition of Cytosine (500 $\mu$ L, 26 $\mu$ M)).

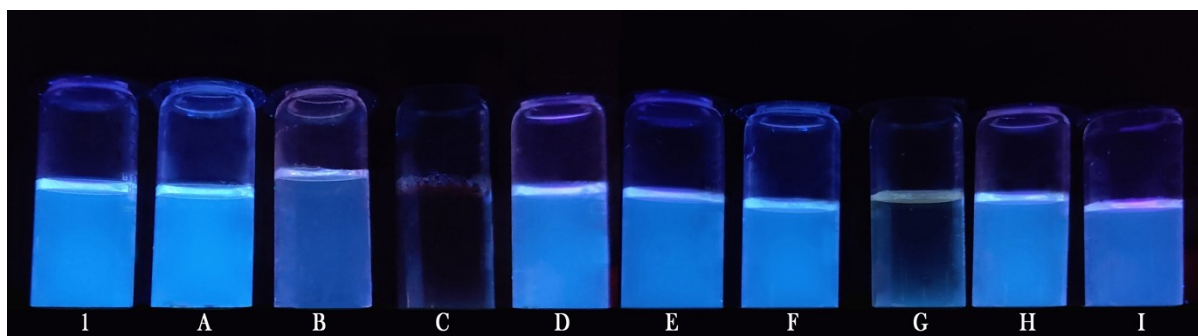

**Figure S31.** Sample vial images of **Co-bpy** in the absence and presence of 50  $\mu\text{L}$  (1 mM) concentration of different analytes [where (1) **Co-bpy**; (A) KI; (B) KCl; (C)  $\text{KMnO}_4$ ; (D)  $\text{K}_2\text{CO}_3$ ; (E)  $\text{KNO}_2$ ; (F)  $\text{KNO}_3$ ; (G)  $\text{K}_2\text{Cr}_2\text{O}_7$ ; (H)  $\text{K}_2\text{S}_2\text{O}_4$  and (I) KBr] after UV light illumination ( $\lambda = 365 \text{ nm}$ ).

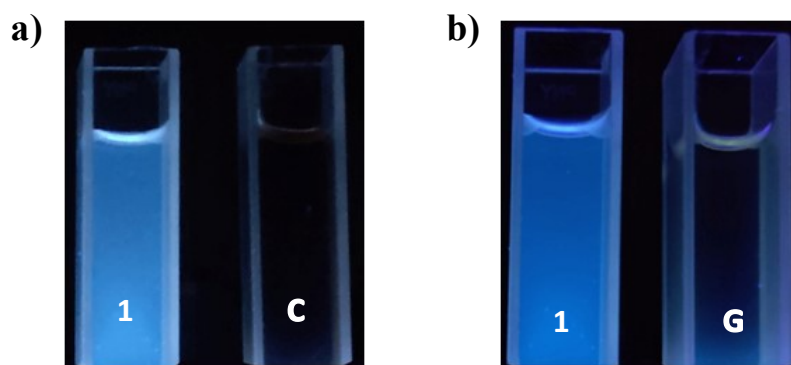

**Figure S32.** Cuvette vial images of **Co-bpy** in the absence 1 and presence of 50  $\mu\text{L}$  (1 mM) concentration of C-  $\text{KMnO}_4$  and G-  $\text{K}_2\text{Cr}_2\text{O}_7$  under UV light illumination ( $\lambda = 365 \text{ nm}$ ).

**Table S4.** Comparison of “Turn-Off” fluorescent property of **Co-bpy** MOF for sensing Oxo-anions with literature data

| Probe                                                                                                      | Detection Limit (M)   | Medium                               | Ref. |
|------------------------------------------------------------------------------------------------------------|-----------------------|--------------------------------------|------|
| $\text{MnO}_4^-$                                                                                           |                       |                                      |      |
| $[\text{Zn}(\text{modbc})_2]_n$                                                                            | $0.15 \times 10^{-6}$ | DMF+ $\text{H}_2\text{O}$            | 4    |
| $\{[\text{Zn}_6\text{Cl}_6(2,2'\text{dbpt})_3] \cdot 6\text{H}_2\text{O}\}_n$                              | $6.14 \times 10^{-6}$ | (DMF:<br>$\text{H}_2\text{O}$ )(1:1) | 5    |
| $\{[\text{Cd}(\text{tpe})(\text{H}_2\text{O})(\text{ip})] \cdot 4\text{H}_2\text{O} \cdot \text{DMAC}\}_n$ | $0.34 \times 10^{-6}$ | $\text{H}_2\text{O}$                 | 6    |

|                                                                                                           |                        |                                      |              |
|-----------------------------------------------------------------------------------------------------------|------------------------|--------------------------------------|--------------|
| $[\text{Ni}_2(\mu_2\text{OH})(\text{azdc})(\text{tpim})](\text{NO}_3)\cdot 6\text{DMA}\cdot 6\text{MeOH}$ | $0.26 \times 10^{-6}$  | $\text{H}_2\text{O}$                 | 7            |
| $[\text{CdQ}_2(\text{H}_2\text{O})_2]$                                                                    | $141 \times 10^{-9}$   | $\text{H}_2\text{O}$                 | 8            |
| $\{\text{Tb}(\text{L}8)_{1.5}(\text{H}_2\text{O})_{4.5}\}_n \text{H}_2\text{O}$                           | $3.90 \times 10^{-7}$  | $\text{H}_2\text{O}$                 | 9            |
| $[\text{Cd}(\text{L}9)(\text{L}10)]\cdot \text{H}_2\text{O}$                                              | $2.56 \times 10^{-4}$  | $\text{H}_2\text{O}$                 | 10           |
| JXUST-9                                                                                                   | $1.23 \times 10^{-6}$  | $\text{H}_2\text{O}$                 | 11           |
| <b>Co-bpy MOF</b>                                                                                         | $9.5 \times 10^{-7}$   | $\text{H}_2\text{O}$                 | Present Work |
| $\text{Cr}_2\text{O}_7^{2-}$                                                                              |                        |                                      |              |
| $[\text{Zn}(\text{modbc})_2]_n$                                                                           | $0.43 \times 10^{-6}$  | $\text{DMF}+\text{H}_2\text{O}$      | 4            |
| $\{[\text{Zn}_6\text{Cl}_6(2,2'\text{-dbpt})_3]\cdot 6\text{H}_2\text{O}\}_n$                             | $13.64 \times 10^{-6}$ | (DMF:<br>$\text{H}_2\text{O}$ )(1:1) | 5            |
| $\{[\text{Cd}(\text{tpe})(\text{H}_2\text{O})(\text{ip})]\cdot 4\text{H}_2\text{O}\cdot \text{DMAC}\}_n$  | $0.09 \times 10^{-6}$  | $\text{H}_2\text{O}$                 | 6            |
| $[\text{Ni}_2(\mu_2\text{OH})(\text{azdc})(\text{tpim})](\text{NO}_3)\cdot 6\text{DMA}\cdot 6\text{MeOH}$ | $0.95 \times 10^{-6}$  | $\text{H}_2\text{O}$                 | 7            |
| $[\text{CdQ}_2(\text{H}_2\text{O})_2]$                                                                    | $178 \times 10^{-9}$   | $\text{H}_2\text{O}$                 | 8            |
| $\{\text{Eu}(\text{L}3)(\text{H}_2\text{O})(\text{DMA})\}_n$                                              | $6.05 \times 10^{-5}$  | $\text{H}_2\text{O}$                 | 12           |
| $[\text{Cd}(\text{L}9)(\text{L}10)]\cdot \text{H}_2\text{O}$                                              | $2.78 \times 10^{-4}$  | $\text{H}_2\text{O}$                 | 10           |
| JXUST-9                                                                                                   | $1.23 \times 10^{-6}$  | $\text{H}_2\text{O}$                 | 11           |
| <b>Co-bpy MOF</b>                                                                                         | $2.6 \times 10^{-6}$   | $\text{H}_2\text{O}$                 | Present Work |

**Table S5.** Comparison of “Turn-Off” fluorescent property of **Co-bpy MOF** for sensing Nucleobases with literature data

| Probe                                  | Detection Limit (M)    | Medium               | Ref.         |
|----------------------------------------|------------------------|----------------------|--------------|
| Adenine                                |                        |                      |              |
| Zn(II)-LCPs                            | $4.83 \times 10^{-6}$  | $\text{H}_2\text{O}$ | 13           |
| L-Tryptophan- $\text{Cu}^{2+}$         | $0.046 \times 10^{-6}$ | $\text{H}_2\text{O}$ | 14           |
| GO-PANI                                | $1.3 \times 10^{-5}$   | $\text{H}_2\text{O}$ | 15           |
| N-GN                                   | $8.0 \times 10^{-5}$   | DMA                  | 16           |
| 2,3-diphenyl quinoxaline nanoparticles | $0.7 \times 10^{-6}$   | $\text{H}_2\text{O}$ | 17           |
| CoTPP                                  | $4.2 \times 10^{-6}$   | $\text{H}_2\text{O}$ | 18           |
| PDVTD-1                                | $10 \times 10^{-6}$    | DMF                  | 19           |
| <b>Co-bpy MOF</b>                      | $3.1 \times 10^{-6}$   | $\text{H}_2\text{O}$ | Present Work |
| Guanine                                |                        |                      |              |
| CDs                                    | $0.67 \times 10^{-7}$  | $\text{H}_2\text{O}$ | 20           |

|                           |                         |                       |              |
|---------------------------|-------------------------|-----------------------|--------------|
| CdTe nanoparticles        | $8 \times 10^{-8}$      | H <sub>2</sub> O      | 21           |
| Cu <sup>2+</sup> -nuclear | $1.9 \times 10^{-6}$    | H <sub>2</sub> O      | 22           |
| Zn(II)-LCPs               | $5.97 \times 10^{-6}$   | H <sub>2</sub> O      | 13           |
| <b>Co-bpy MOF</b>         | $3.5 \times 10^{-6}$    | H <sub>2</sub> O      | Present Work |
| Thymine                   |                         |                       |              |
| bis-BODIPY derivatives    | $1.53 \times 10^{-6}$   | DMSO/H <sub>2</sub> O | 23           |
| PDVTD-1                   | $10 \times 10^{-6}$     | H <sub>2</sub> O      | 19           |
| <b>Co-bpy MOF</b>         | $3.0 \times 10^{-6}$    | H <sub>2</sub> O      | Present Work |
| Cytosine                  |                         |                       |              |
| PDVTD-1                   | $0.5 \times 10^{-6}$    | H <sub>2</sub> O      | 19           |
| <b>Co-bpy MOF</b>         | $0.0969 \times 10^{-6}$ | H <sub>2</sub> O      | Present Work |
| Uracil                    |                         |                       |              |
| PDVTD-1                   | $10 \times 10^{-6}$     | H <sub>2</sub> O      | 19           |
| <b>Co-bpy MOF</b>         | $3 \times 10^{-6}$      | H <sub>2</sub> O      | Present Work |

#### References:

1. Bruker Analytical X-ray Systems, SMART: Bruker Molecular Analysis Research Tool, Version 5.618; Bruker AXS: Madison, WI2000.
2. G. M. Sheldrick, "SAINT-NT, version 6.04." Bruker Analytical X-ray Systems: Madison, WI2001.
3. Bruker Analytical X-ray Systems, SHELXTL-NT, Version 6.10; Bruker AXS: Madison, WI2000.
4. Y. Wu, D. Liu, M. Lin and J. Qian, *RSC Adv.*, 2020, **10**, 6022-6029.
5. Y. Cao, Y. Zhang, L. W. Gu, X. M. Qin, H. Y. Li, H. D. Bian and F. P. Huang, *New J. Chem.*, 2020, **44**, 10681-10688.
6. Z. X. Wang, H. X. Tian, M. Li, M. Zha, B. L. Li and B. Wu, *Appl. Organomet. Chem.*, 2020, **34**, 5977.
7. R. Goswami, G. Nilanjan, N. Seal, S. R. Dash, A. Tyagi and S. Neogi, *ACS Appl. Mater. Interfaces*. 2019, **11**, 43, 40134–40150.
8. D. B. Kanzariya, T. S. Khan, S. Das, P. Lama, R. Bandyopadhyay and T. K. Pal, *Dalton Trans.*, 2022, **51**, 7436-7454.
9. Z. L. Ma, J. Y. Shi, M. C. Wang and L. Tian, *Dyes Pigm.*, 2021, **185**, 108930.
10. G. H. Liu, Y. Li, J. Chi, N. Xu, X. L. Wang, H. Y. Lin, B. K. Chen and J. R. Li, *Dalton Trans.*, 2020, **49**, 737-749.



11. Q. Q. He, S. L. Yao, T. F. Zheng, H. Xu, S. J. Liu, J. L. Chen, N. Li, H. R. Wen, *CrystEngComm.*, 2022, **24**, 1041-1048.
12. Y. T. Yan, W. Y. Zhang, F. Zhang, F. Cao, R. F. Yang, Y. Y. Wang and L. Hou, *Dalton Trans.*, 2018, **47**, 1682-1692.
13. X. Wang, J. Ma, N. Xu, Y. Wang, J. Sun and G. Liu, *CrystEngComm.*, 2021, **23**, 4760.
14. R. Duan, C. Li, S. Liu, Z. F. Liu and Y. F. Li, *Spectrochim. Acta A Mol. Biomol. Spectrosc.*, 2016, **152**, 272-277.
15. S. N. Tayade, A. K. Tawade, P. Talele, S. S. Chavhan and K. K. K. Sharma, *Methods Appl. Fluoresc.*, 2019, **7**, 045002.
16. J. Li, J. Jiang, H. Feng, Z. Xu, S. Tang, P. Deng and D. Qian, *RSC adv.*, 2016, **6**, 31565-31573.
17. S. B. Suryawanshi, G. R. Deshmukh, A. J. Bodake and S. R. Patil, *J. emerg. technol. innov. res.*, 2020, **7**, 139-145.
18. S. Francis and L. Rajith, *J. Fluoresc.*, 2021, **31**, 577-586.
19. P. Bhanja, R. Gomes and A. Bhaumik, *RSC Adv.*, 2015, **5**, 74916-74923.
20. S. Pang, Y. Zhang, C. Wu and S. Feng, *Sens. Actuators B: Chem.*, 2016, **222**, 857-863.
21. L. Li, Y. Lu, Y. Ding, F. Zhang and Y. Wang, *Can. J. Chem.*, 2012, **90**, 173-179.
22. Y. Cui, J. Yu and S. Feng, *Talanta*, 2014, **130**, 536-541.
23. J. Bi, X. Ji, M. Guo, H. Guo and F. Yang, *New J. Chem.*, 2019, **43**, 5890-5896.
